# Supplementary material for: Gait Impairment in Traumatic Brain Injury: A Systematic Review
Source: MDPI journal article supplement (doi:10.3390/s22041480), 2022-02-14
Supplement: s1 [file s1]

**Supplementary Table S1: List of articles that did not meet inclusion criteria and reason for exclusion**

| Citation                                                                                                                                                                                                                                                                                                                       | Reason for exclusion     |
|--------------------------------------------------------------------------------------------------------------------------------------------------------------------------------------------------------------------------------------------------------------------------------------------------------------------------------|--------------------------|
| Buckley, T.A., Munkasy, B.A. and Evans, K.M., (2014). Dual Task Gait Testing Identifies Lingering Post Concussion Impairments: 2170 Board# 7 May 29, 5: 45 PM-6: 45 PM. <i>Medicine &amp; Science in Sports &amp; Exercise</i> , 46(5S), p.584.                                                                                | Conference extract.      |
| Catena, R.D., Van Donkelaar, P. and Chou, L.S., (2007). Cognitive task effects on gait stability following concussion. <i>Experimental brain research</i> , 176(1), pp.23-31.                                                                                                                                                  | Inclusion of u18's.      |
| Dugan, E.L., Shilt, J.S., Masterson, C.M. and Ernest, K.M., 2021. The use of inertial measurement units to assess gait and postural control following concussion. <i>Gait &amp; Posture</i> , 83, pp.262-267.                                                                                                                  | Inclusion of u18's.      |
| Geurts, A.C., Ribbers, G.M., Knoop, J.A. and van Limbeek, J., (1996). Identification of static and dynamic postural instability following traumatic brain injury. <i>Archives of physical medicine and rehabilitation</i> , 77(7), pp.639-644.                                                                                 | No control participants. |
| Howell, D.R., Osternig, L.R. and Chou, L.S., (2015). Return to activity after concussion affects dual-task gait balance control recovery. <i>Medicine and science in sports and exercise</i> , 47(4), pp.673-680.                                                                                                              | Inclusion of u18's.      |
| Howell, D.R., Osternig, L.R., Christie, A.D. and Chou, L.S., (2016). Return to physical activity timing and dual-task gait stability are associated 2 months following concussion. <i>The Journal of head trauma rehabilitation</i> , 31(4), pp.262-268.                                                                       | Inclusion of u18's.      |
| Howell, D.R., Oldham, J.R., DiFabio, M., Vallabhajosula, S., Hall, E.E., Ketcham, C.J., Meehan, W.P. and Buckley, T.A., (2017). Single-task and dual-task gait among collegiate athletes of different sport classifications: implications for concussion management. <i>Journal of applied biomechanics</i> , 33(1), pp.24-31. | Prior TBI history.       |
| Howell, D.R., Brilliant, A., Berkstresser, B., Wang, F., Fraser, J. and Meehan III, W.P., (2017). The association between dual-task gait after concussion and prolonged symptom duration. <i>Journal of neurotrauma</i> , 34(23), pp.3288-3294.                                                                                | Inclusion of u18's.      |
| Howell, D.R., Stracciolini, A., Geminiani, E. and Meehan III, W.P., (2017). Dual-task gait differences in female and male adolescents following sport-related concussion. <i>Gait &amp; posture</i> , 54, pp.284-289.                                                                                                          | Inclusion of u18's.      |
| Howell, D.R., Osternig, L.R. and Chou, L.S., (2017). Single-task and dual-task tandem gait test performance after concussion. <i>Journal of science and medicine in sport</i> , 20(7), pp.622-626.                                                                                                                             | Inclusion of u18's.      |
| Howell, D.R., Buckley, T.A., Lynall, R.C. and Meehan III, W.P., (2018). Worsening dual-task gait costs after concussion and their association with subsequent sport-related injury. <i>Journal of neurotrauma</i> , 35(14), pp.1630-1636.                                                                                      | Inclusion of u18's.      |
| Howell, D.R., Osternig, L.R. and Chou, L.S., (2018). Detection of acute and long-term effects of concussion: Dual-task gait balance control versus computerized neurocognitive test. <i>Archives of physical medicine and rehabilitation</i> , 99(7), pp.1318-1324.                                                            | Inclusion of u18's.      |
| Howell, D.R., Stillman, A., Buckley, T.A., Berkstresser, B., Wang, F. and Meehan III, W.P., (2018). The utility of instrumented dual-task gait and tablet-based neurocognitive measurements after concussion. <i>Journal of science and medicine in sport</i> , 21(4), pp.358-362.                                             | Prior TBI history.       |
| Howell, D.R., Bonnette, S., Diekfuss, J.A., Grooms, D.R., Myer, G.D., Wilson, J.C. and Meehan, W.P., (2020). Dual-task gait stability after concussion and subsequent injury: an exploratory investigation. <i>Sensors</i> , 20(21), p.6297.                                                                                   | Inclusion of u18's.      |
| Howell DR, Oldham J, Lanois C, Koerte I, Lin AP, Berkstresser B, et al. Dual-Task Gait Recovery after Concussion among Female and Male Collegiate Athletes. <i>Med Sci Sports Exerc</i> [Internet]. 2020 May 1 [cited 2021 Nov 9];52(5):1015. Available from:/pmc/articles/PMC7166163/                                         | No control participants. |

---

|                                                                                                                                                                                                                                                                           |                                          |
|---------------------------------------------------------------------------------------------------------------------------------------------------------------------------------------------------------------------------------------------------------------------------|------------------------------------------|
| Leland, A., Tavakol, K., Scholten, J., Mathis, D., Maron, D. and Bakhshi, S., (2017). The role of dual tasking in the assessment of gait, cognition and community reintegration of veterans with mild traumatic brain injury. <i>Materia socio-medica</i> , 29(4), p.251. | No control participants.                 |
| McCulloch, K.L., Buxton, E., Hackney, J. and Lowers, S., (2010). Balance, attention, and dual-task performance during walking after brain injury: associations with falls history. <i>The Journal of head trauma rehabilitation</i> , 25(3), pp.155-163.                  | No control participants.                 |
| Niechwiej-Szwedo, E., Inness, E.L., Howe, J.A., Jaglal, S., McIlroy, W.E. and Verrier, M.C., (2007). Changes in gait variability during different challenges to mobility in patients with traumatic brain injury. <i>Gait &amp; posture</i> , 25(1), pp.70-77.            | TBI severity and type not distinguished. |
| Williams, G., Morris, M.E., Schache, A. and McCrory, P.R., 2009. Incidence of gait abnormalities after traumatic brain injury. <i>Archives of physical medicine and rehabilitation</i> , 90(4), pp.587-593.                                                               | Inclusion of u18's.                      |

---
